# Supplementary material for: Transgenerational Effect of Drought Stress and Sub-Lethal Doses of Quizalofop-p-ethyl: Decreasing Sensitivity to Herbicide and Biochemical Adjustment in Eragrostis plana
Source: MDPI journal article supplement (doi:10.3390/agriculture12030396), 2022-03-11
Supplement: s1 [file s1]

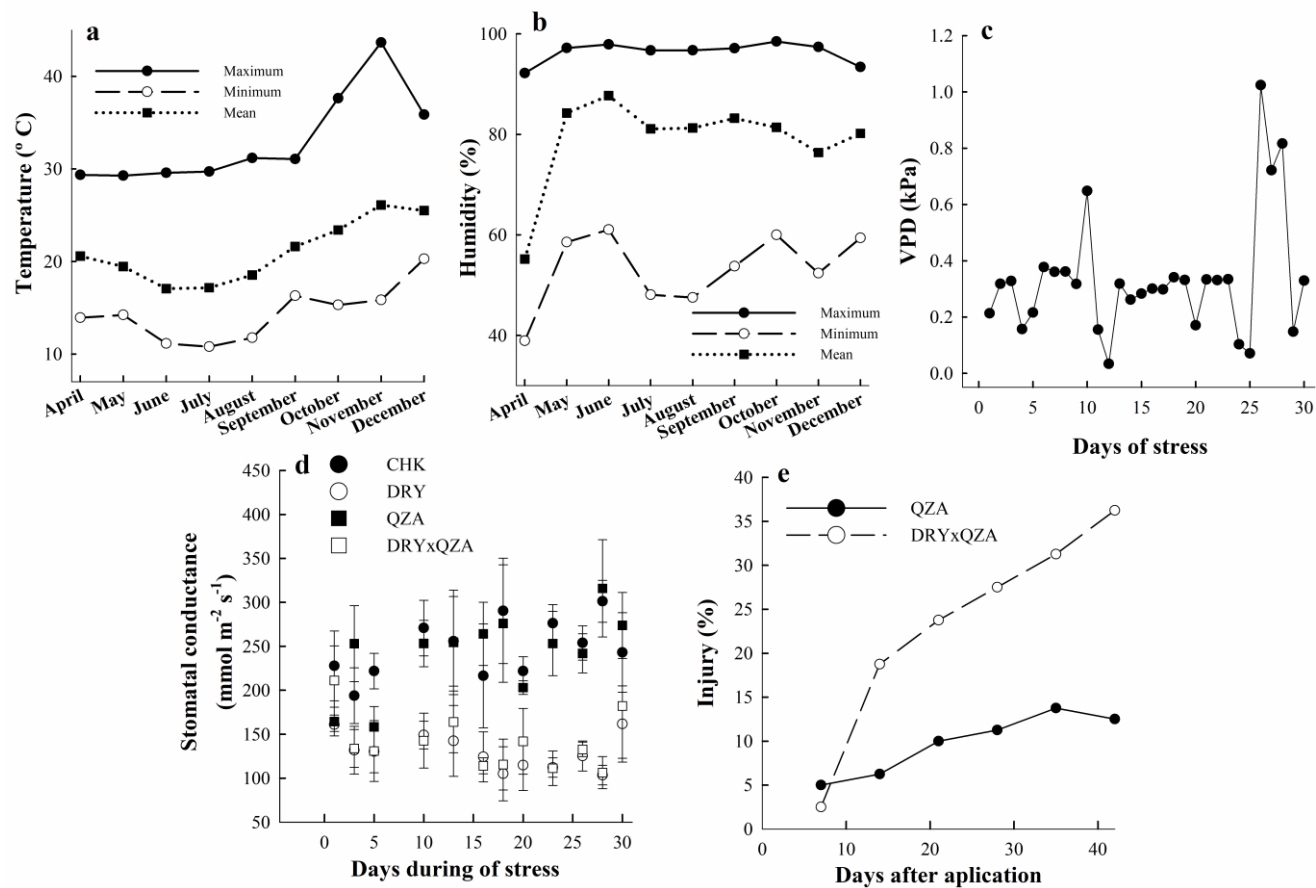

Figure S1. Relation of maximum, medium and minimum temperature (a) and humidity (b); vapor pressure deficit (VPD) (c), stomatal conductance (d) during drought stress (06/18/17-07/17/17) and injury of quizalofop (e) in generation  $F_0$  of *Eragrostis plana* in green house. CHK (no stress), DRY (drought), QZA (quizalofop-p-ethyl), and DRYxQZA (drought followed by quizalofop-p-ethyl). 2017

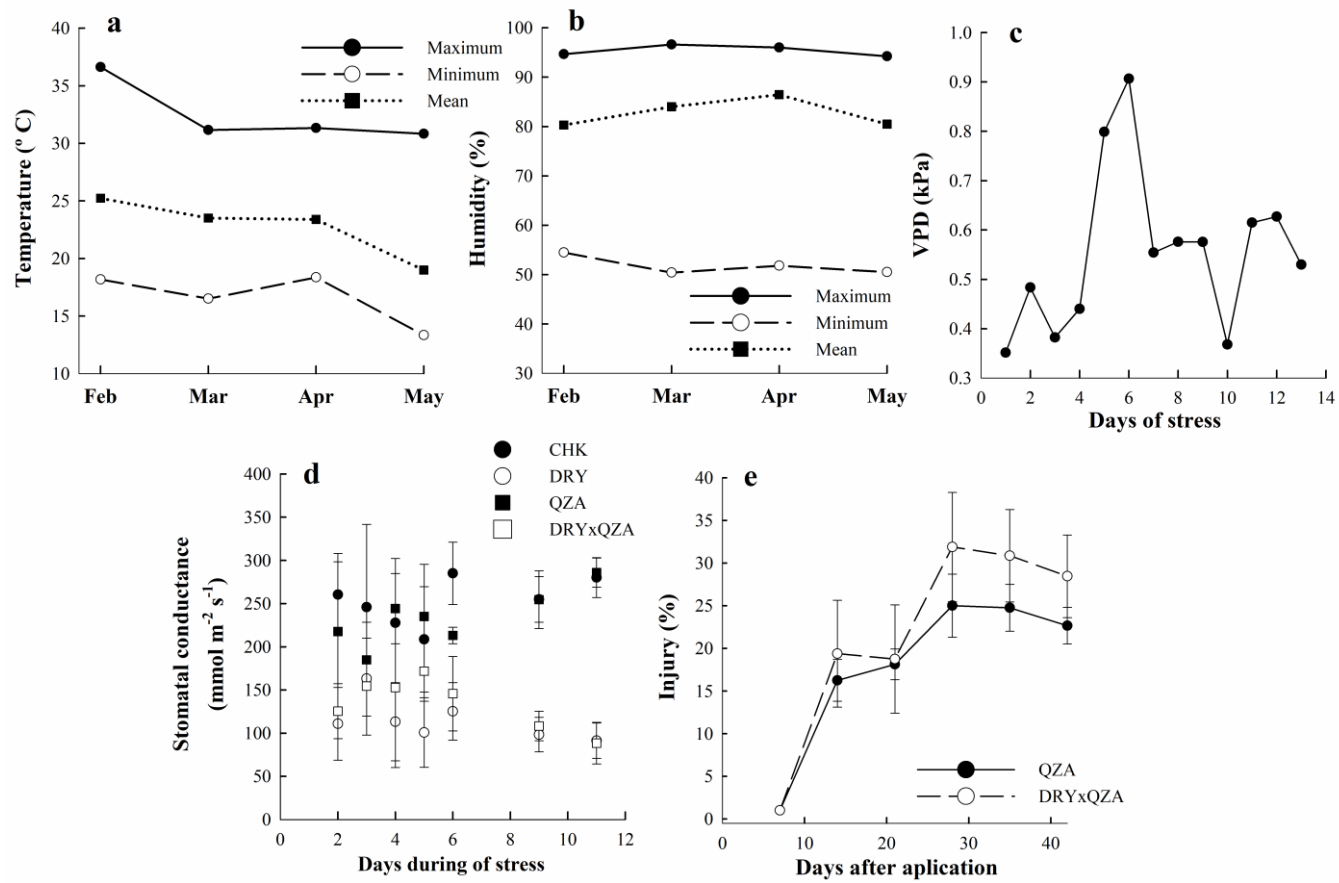

Figure S2. Relation of maximum, medium and minimum temperature (a) and humidity (b); vapor pressure deficit (VPD) (c) and stomatal conductance (d) during drought stress (04/06/18-04/18/18); injury of glyphosate (e) in generation **F**<sub>1</sub> of *Eragrostis plana* in green house. CHK (no stress), DRY (drought), QZA (quizalofop-p-ethyl), and DRY×QZA (drought followed by quizalofop-p-ethyl). 2018
